# Supplementary material for: Bioinformatic analysis of the neprilysin (M13) family of peptidases reveals complex evolutionary and functional relationships
Source: PubMed Central journal article supplement (PMC2259306; doi:10.1186/1471-2148-8-16), 2008-01-23
Supplement: 1471-2148-8-16-S1.pdf [file 1471-2148-8-16-S1.pdf]

| Name           | Accession number                | Organism                        | Source     |
|----------------|---------------------------------|---------------------------------|------------|
| <u>DmeNEP1</u> | CG5905                          | <i>Drosophila melanogaster</i>  | FlyBase    |
| <u>DmeNEP2</u> | CG9761                          |                                 |            |
| <u>DmeNEP3</u> | CG9565                          |                                 |            |
| <u>DmeNEP4</u> | CG4058                          |                                 |            |
| DmeNEP5        | CG6265                          |                                 |            |
| DmeCG14526     | CG14526                         |                                 |            |
| DmeCG5527      | CG5527                          |                                 |            |
| DmeCG14527     | CG14527                         |                                 |            |
| DmeCG14528     | CG14528                         |                                 |            |
| DmeCG15485     | CG15485                         |                                 |            |
| DmeCG14529     | CG14529                         |                                 |            |
| DmeCG8358      | CG8358                          |                                 |            |
| DmeCG4721      | CG4721                          |                                 |            |
| DmeCG4725      | CG4725                          |                                 |            |
| DmeCG9634      | CG9634                          |                                 |            |
| <u>Aga1</u>    | XP 318885<br>ENSANGP00000015756 | <i>Anopheles gambiae</i>        | ENSEMBL    |
| <u>Aga3</u>    | XP 317711<br>ENSANGP00000010035 |                                 |            |
| <u>Aga2</u>    | XP 321277<br>ENSANGP00000008439 |                                 |            |
| <u>Aga4</u>    | XP 312790<br>ENSANGP00000003181 |                                 |            |
| <u>Aga5</u>    | XP 312504<br>ENSANGP00000001161 |                                 |            |
| <u>Aga6</u>    | XP 306840<br>ENSANGP00000000184 |                                 |            |
| Dps1           |                                 | <i>Drosophila pseudoobscura</i> | This study |
| Dps2           |                                 |                                 |            |
| Dps3           |                                 |                                 |            |
| Dps4           |                                 |                                 |            |
| Dps5           |                                 |                                 |            |
| Dps7           |                                 |                                 |            |
| Dps9           |                                 |                                 |            |
| Dps10          |                                 |                                 |            |
| LmiECE         | AAN73018                        | <i>Locusta migratoria</i>       | NCBI       |
| BmoNEP         | BAB33300                        | <i>Bombyx mori</i>              |            |
| Ame1           |                                 | <i>Apis mellifera</i>           | This study |

|                 |                         |                              |                     |
|-----------------|-------------------------|------------------------------|---------------------|
| Ame2            | XP 392043               |                              | NCBI                |
| Ame3            | XP 393860               |                              |                     |
| Ame4            | XP 394870               |                              |                     |
| Ame5            | XP 394794               |                              |                     |
| Ame6            |                         |                              | This study          |
| Ame7            | XP 394512               |                              |                     |
| Ame8            | XP 393860               |                              |                     |
| Ame9            | XP 393242               |                              |                     |
| <u>HsaNEP</u>   | NP 009220               |                              | <i>Homo sapiens</i> |
| <u>HsaMMEL2</u> | NP 258428               |                              |                     |
| <u>HsaECE1</u>  | NP 001388               |                              |                     |
| <u>HsaECE2</u>  | NP 055508               |                              |                     |
| <u>HsaPHEX</u>  | NP 000435               |                              |                     |
| <u>HsaECEL1</u> | NP 004817               |                              |                     |
| <u>HsaKELL</u>  | NP 000411               |                              |                     |
| RnoNEP          | NP 036740               | <i>Rattus norvegicus</i>     |                     |
| RnoNEPII        | XP 233712               |                              |                     |
| RnoECE1         | NP 446048               |                              |                     |
| RnoECE2         | NP 001002815            |                              |                     |
| RnoPHEX         | NP 037136               |                              |                     |
| RnoDINE         | NP 068544               |                              |                     |
| RnoKELL         | XP 342675 XP 216130     |                              |                     |
| MmuNEP          | NP 032630               | <i>Mus musculus</i>          |                     |
| <u>MmuSEP</u>   | NP 038811               |                              |                     |
| MmuECE1         | NP 955011               |                              |                     |
| <u>MmuECE2</u>  | NP 647454               |                              |                     |
| <u>MmuPHEX</u>  | NP 035207               |                              |                     |
| <u>MmuDINE</u>  | NP 067281               |                              |                     |
| <u>MmuKELL</u>  | NP 115929               |                              |                     |
| <u>Fru1</u>     | lcl SINFRUUP00000050651 | <i>Fugu rubripes</i>         | ENSEMBL             |
| <u>Fru2</u>     | lcl SINFRUUP00000050652 |                              |                     |
| <u>Fru3</u>     | lcl SINFRUUP00000076626 |                              |                     |
| <u>Fru4</u>     | lcl SINFRUUP00000061415 |                              |                     |
| <u>Fru5</u>     | lcl SINFRUUP00000079115 |                              |                     |
| <u>Fru6</u>     | lcl SINFRUUP00000073981 |                              |                     |
| PflNEP          | AAC28366                | <i>Perca flavescens</i>      | NCBI                |
| XlaECE          | AAH46653                | <i>Xenopus laevis</i>        |                     |
| OcuNEP          | P08049                  | <i>Oryctolagus cuniculus</i> |                     |
| BtaECE          | AAB32062                | <i>Bos taurus</i>            |                     |

|                     |              |                                |          |
|---------------------|--------------|--------------------------------|----------|
| CpoECE              | AAB46734     | <i>Cavia porcellus</i>         |          |
| Cin1                | Ci0100146342 | <i>Ciona intestinalis</i>      | JGI      |
| Cin2                | Ci0100130428 |                                |          |
| Cin3                | Ci0100143599 |                                |          |
| Cin4                | Ci0100130465 |                                |          |
| Cin5                | Ci0100139058 |                                |          |
| <u>CelT05A8.4</u>   | T05A8.4      | <i>Caenorhabditis elegans</i>  | WormBase |
| CelF18A12.8a        | F18A12.8a    |                                |          |
| <u>Cel10ZK20.6</u>  | 10ZK20.6     |                                |          |
| <u>CelF18A12.8b</u> | F18A12.8b    |                                |          |
| <u>CelT16A9.4</u>   | T16A9.4      |                                |          |
| <u>CelF26G1.6</u>   | F26G1.6      |                                |          |
| CelF54F11.2         | F54F11.2     |                                |          |
| CelZK970.1a         | ZK970.1a     |                                |          |
| CelZK970.1b         | ZK970.1b     |                                |          |
| CelC49D10.10        | C49D10.10    |                                |          |
| CelF18A12.1         | F18A12.1     |                                |          |
| CelT25B6.2b         | T25B6.2b     |                                |          |
| CelT25B6.2a         | T25B6.2a     |                                |          |
| CelT06D4.3          | T06D4.3      |                                |          |
| CelF39E9.4          | F39E9.4      |                                |          |
| CelF18A12.6         | F18A12.6     |                                |          |
| CelK02F6.9          | K02F6.9      |                                |          |
| CelY116A8C.4        | Y116A8C.4    |                                |          |
| CelF18A12.4         | F18A12.4     |                                |          |
| CelY116A8C.5        | Y116A8C.5    |                                |          |
| CbrP04554           | P04554       | <i>Caenorhabditis briggsae</i> |          |
| CbrP04222           | P04222       |                                |          |
| CbrP00640           | P00640       |                                |          |
| CbrP01247           | P01247       |                                |          |
| CbrP04923           | P04923       |                                |          |
| CbrP04955           | P04955       |                                |          |
| CbrP04749           | P04749       |                                |          |
| CbrP04223           | P04223       |                                |          |
| CbrP01131           | P01131       |                                |          |
| CbrP00057           | P00057       |                                |          |
| CbrP19077           | P19077       |                                |          |
| CbrP01207           | P01207       |                                |          |
| CbrP01132           | P01132       |                                |          |

|           |        |  |  |
|-----------|--------|--|--|
| CbrP14401 | P14401 |  |  |
|-----------|--------|--|--|
