# Supplementary material for: Bioinformatic analysis of the neprilysin (M13) family of peptidases reveals complex evolutionary and functional relationships
Source: PubMed Central journal article supplement (PMC2259306; doi:10.1186/1471-2148-8-16), 2008-01-23

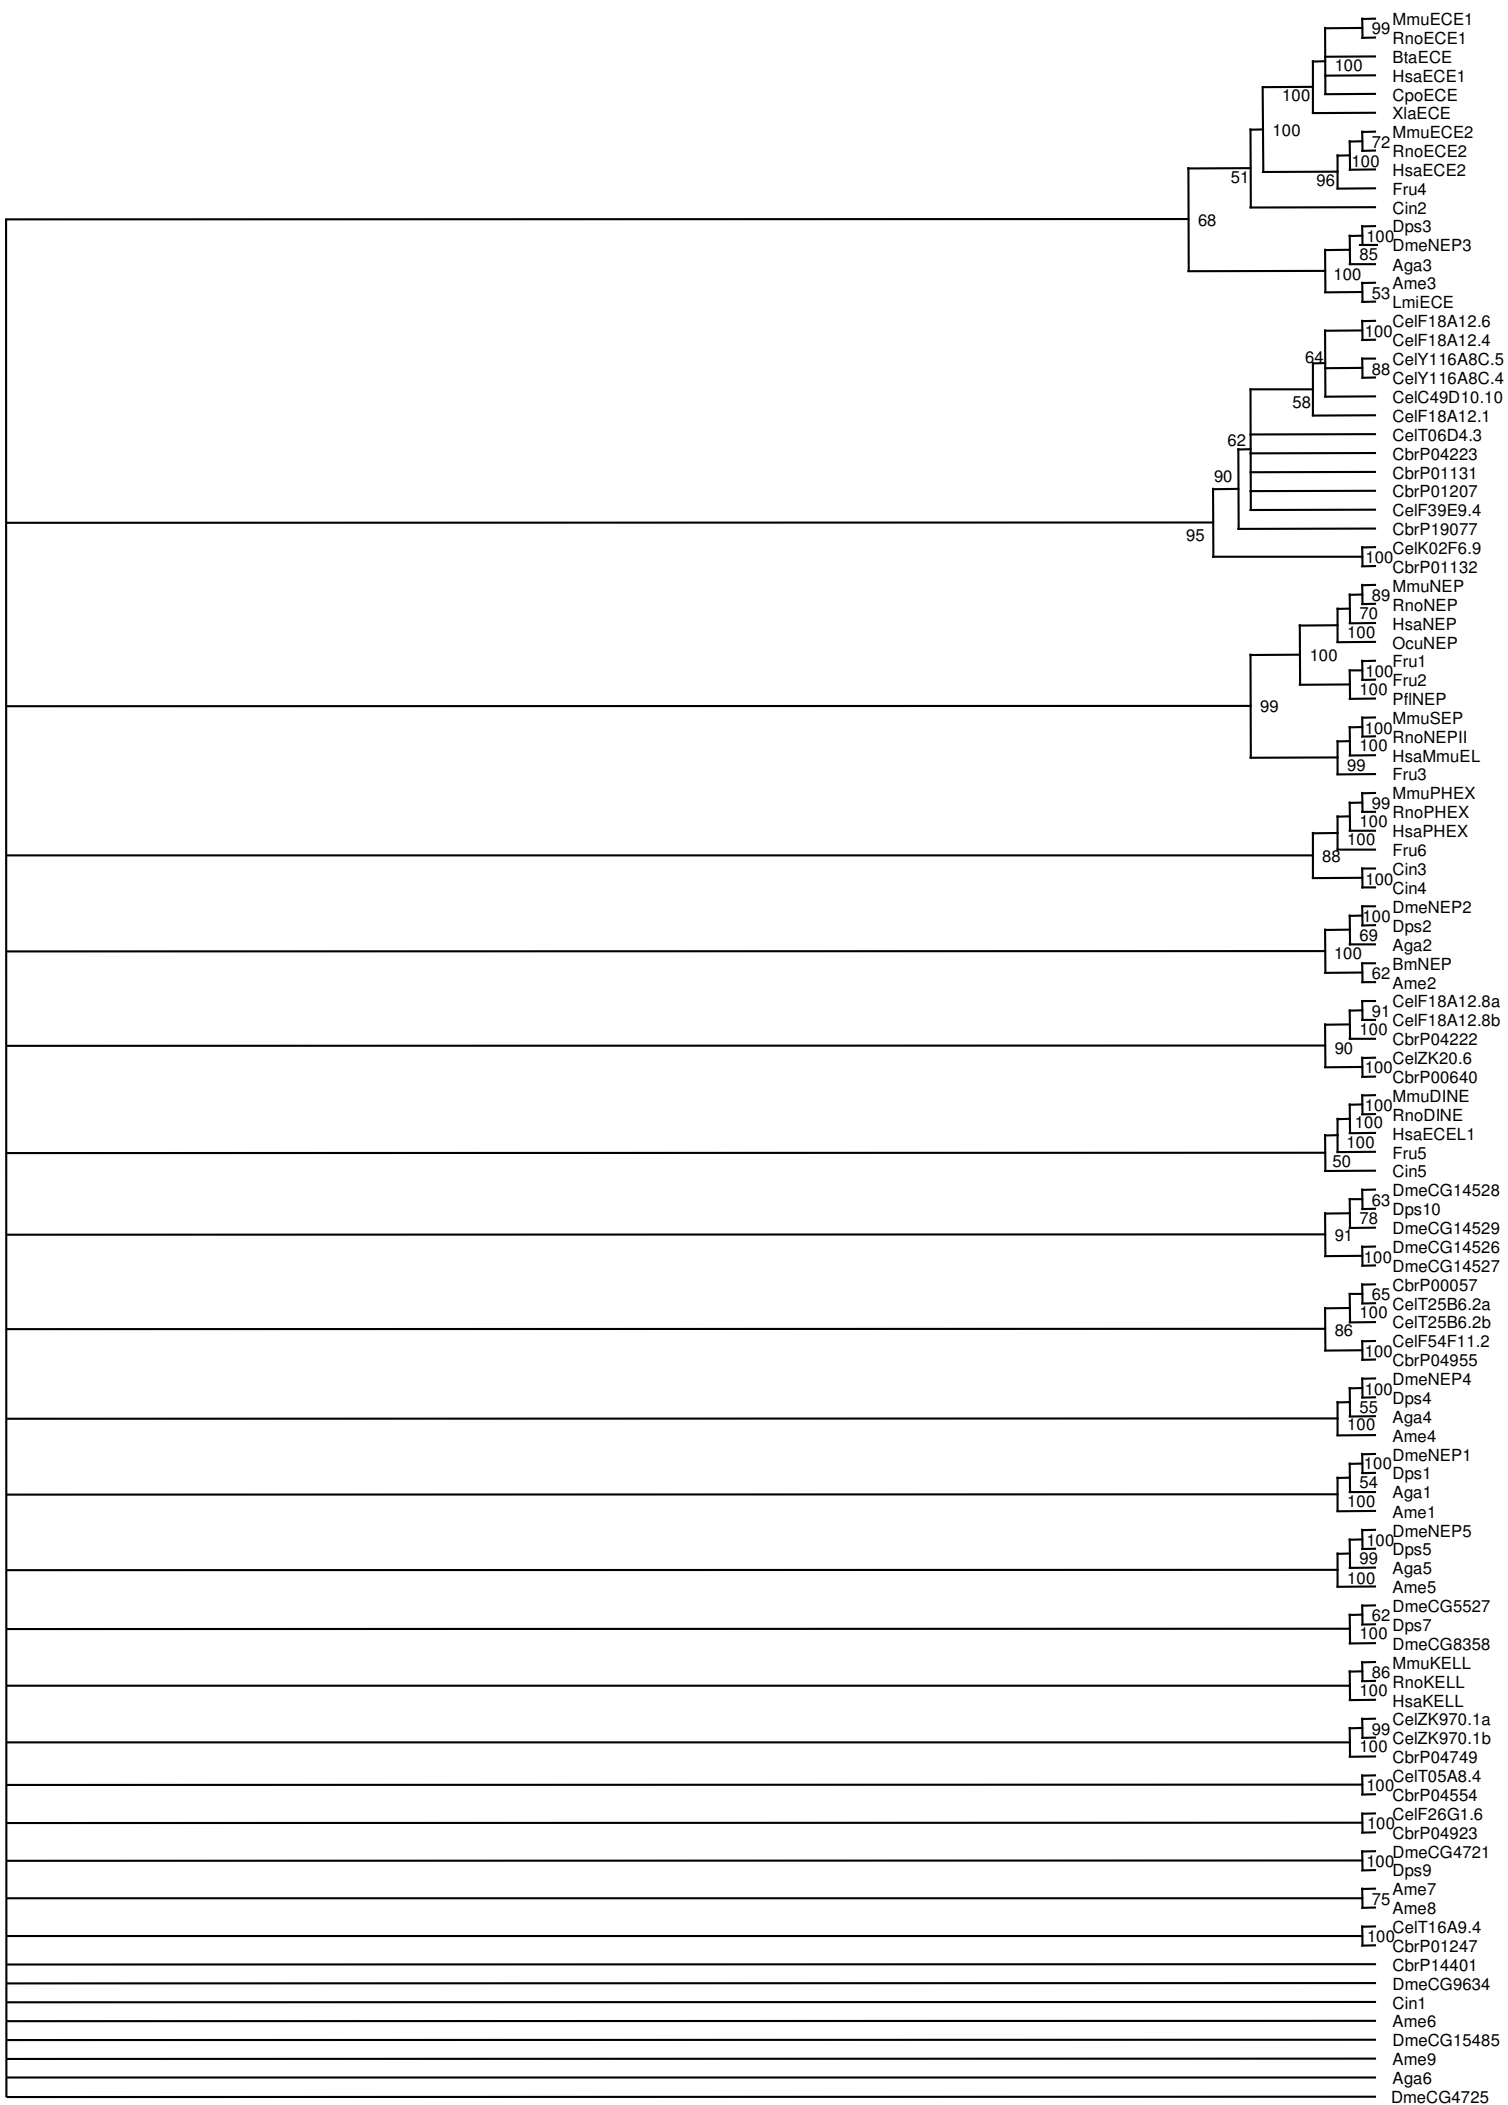

Supplement: 1471-2148-8-16-S5.pdf [file 1471-2148-8-16-S5.pdf]
